# Supplementary material for: A Novel Monoclonal Antibody Targeting a Large Surface of the Receptor Binding Motif Shows Pan-neutralizing SARS-CoV-2 Activity Including BQ.1.1 Variant
Source: bioRxiv or medRxiv preprint supplement (doi:10.1101/2023.01.20.524748), 2023-01-23
Supplement: Supplementary file [file media-1.pdf]

## **A Novel Monoclonal Antibody Targeting a Large Surface of the Receptor Binding Motif Shows Pan-neutralizing SARS-CoV-2 Activity Including BQ.1.1 Variant**

**Leire de Campos-Mata, Benjamin Trinité, Andrea Modrego, Sonia Tejedor Vaquero, Edwards Pradenas, Natalia Rodrigo Melero, Diego Carlero, Silvia Marfil, Anna Pons-Grífols, María Teresa Bueno-Carrasco, César Santiago, Ferran Tarrés-Freixas, Victor Urrea, Nuria Izquierdo, Eva Riveira-Muñoz, Ester Ballana, Mónica Pérez, Júlia Vergara-Alert, Joaquim Segalés, Carlo Carolis\*, Rocío Arranz\*, Julià Blanco\*, Giuliana Magri\***

\*Corresponding authors:

Carlo Carolis, [carlo.carolis@crg.eu](mailto:carlo.carolis@crg.eu);

Rocío Arranz, [rarranz@cnb.csic.es](mailto:rarranz@cnb.csic.es);

Julià Blanco, [jblanco@irsicaixa.es](mailto:jblanco@irsicaixa.es);

Giuliana Magri, [gmagri@imim.es](mailto:gmagri@imim.es)

This file includes:

Supplementary Figures and legends 1-5

Supplementary Tables 1-4

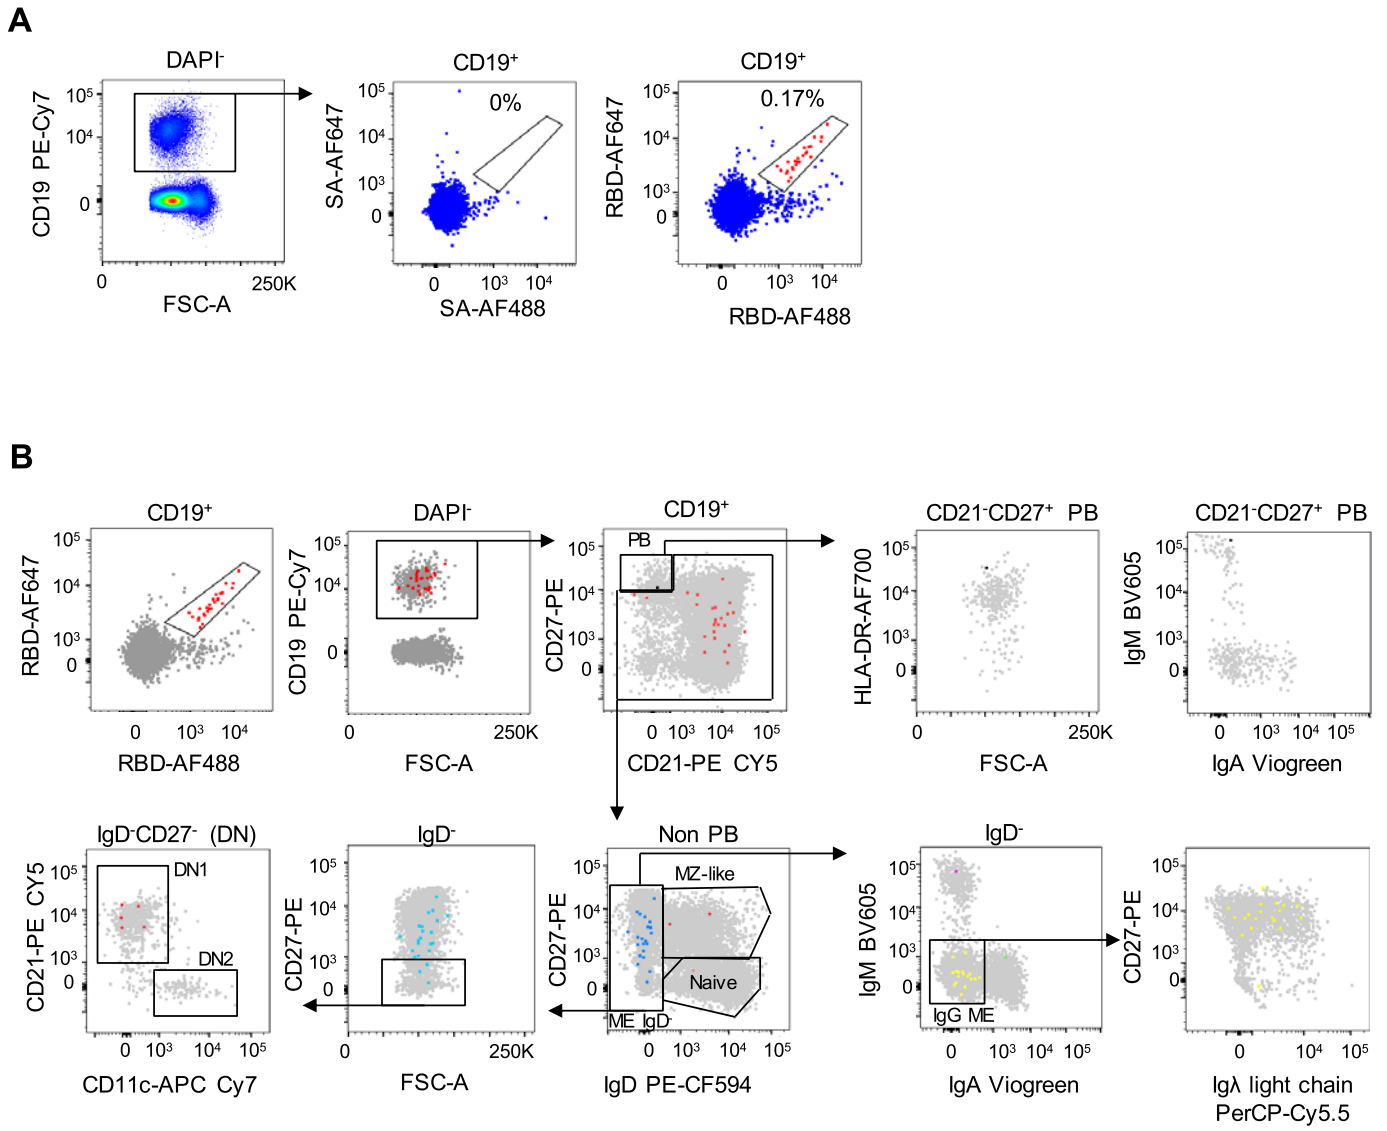

**Supplementary Figure 1. Characterization SARS CoV-2 WH1 RBD-specific B cells by flow cytometry.** (A) Flow cytometry staining of CD19<sup>+</sup> B cells from a convalescent COVID-19 individual without (left) and with (right) two fluorescently labeled biotinylated RBD probes. Numbers indicate the percentage of RBD-specific cells within total CD19<sup>+</sup> B cells. Red large dots represent cells that are positive for both RBD-AF647 and RBD-AF488. (B) Gating strategy used to define RBD-specific B cell populations: PBs (CD19<sup>+</sup>CD27<sup>++</sup>CD21<sup>-</sup>), MZ-like (non-PB CD19<sup>+</sup>CD27<sup>+</sup>IgD<sup>+</sup>), naïve (non-PB CD19<sup>+</sup>CD27<sup>-</sup>IgD<sup>+</sup>), ME IgD<sup>-</sup> (non-PB CD19<sup>+</sup>IgD<sup>-</sup>), IgM<sup>+</sup> ME (non-PB CD19<sup>+</sup>IgD<sup>-</sup>IgM<sup>+</sup>), IgA<sup>+</sup> ME (non-PB CD19<sup>+</sup>IgD<sup>-</sup>IgA<sup>+</sup>), IgG<sup>+</sup> ME (non-PB CD19<sup>+</sup>IgD<sup>-</sup>IgG<sup>+</sup>), DN1 (non-PB CD19<sup>+</sup>IgD<sup>-</sup>CD27<sup>-</sup>CD21<sup>+</sup>CD11c<sup>-</sup>), and DN2 (non-PB CD19<sup>+</sup>IgD<sup>-</sup>CD27<sup>-</sup>CD21<sup>-</sup>CD11c<sup>+</sup>). RBD-specific cells are represented in colored large dots.

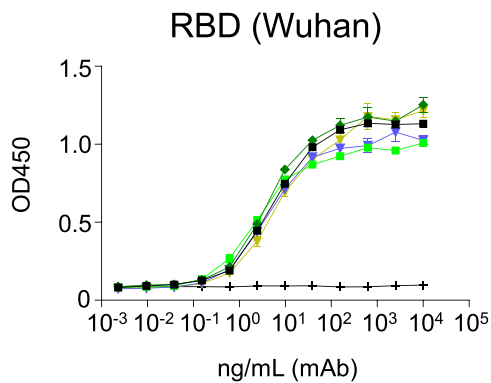

17T2  
54T1  
130T1  
119T2  
131T2  
Neg Ctrl

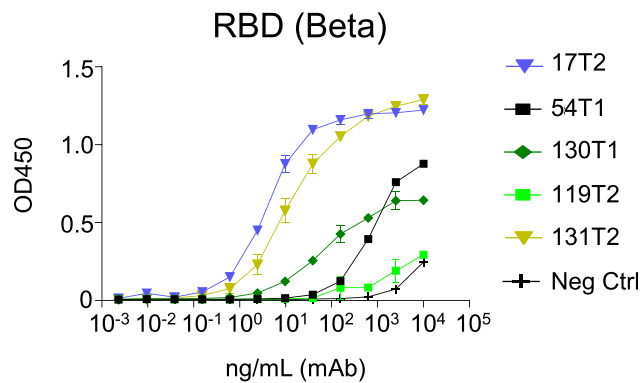

17T2  
54T1  
130T1  
119T2  
131T2  
Neg Ctrl

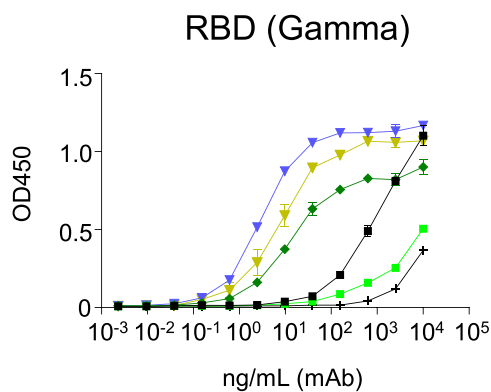

17T2  
54T1  
130T1  
119T2  
131T2  
Neg Ctrl

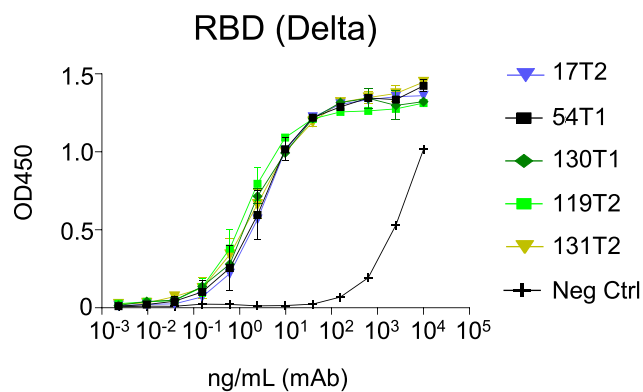

17T2  
54T1  
130T1  
119T2  
131T2  
Neg Ctrl

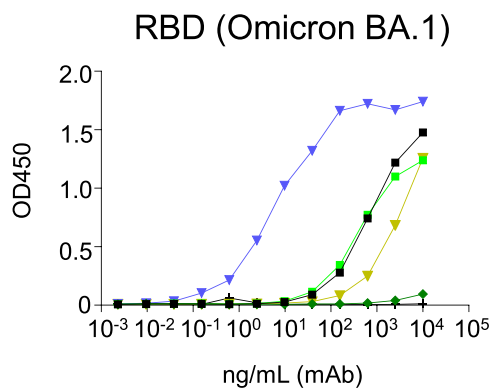

17T2  
54T1  
130T1  
119T2  
131T2  
Neg Ctrl

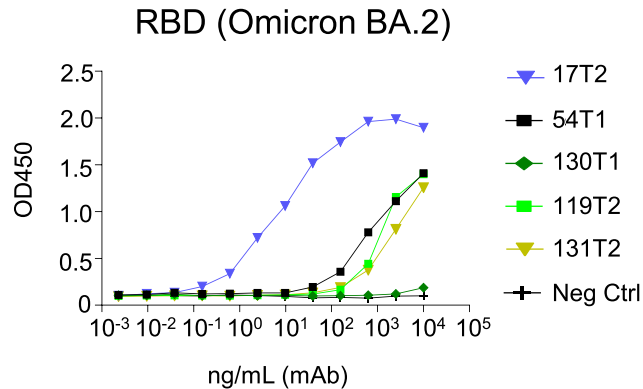

17T2  
54T1  
130T1  
119T2  
131T2  
Neg Ctrl

**Supplementary Figure 2. Reactivity of SARS-CoV-2 RBD-specific monoclonal antibodies.** ELISA binding curves of serial dilutions of the mAbs to the spike RBD of SARS-CoV-2 from different variants, coated at equimolar concentrations. Graph bars represent the average  $\pm$  SD. Human IgG1 purified from serum of a myeloma patient (binding site company, BP078) was used as a negative control for binding.

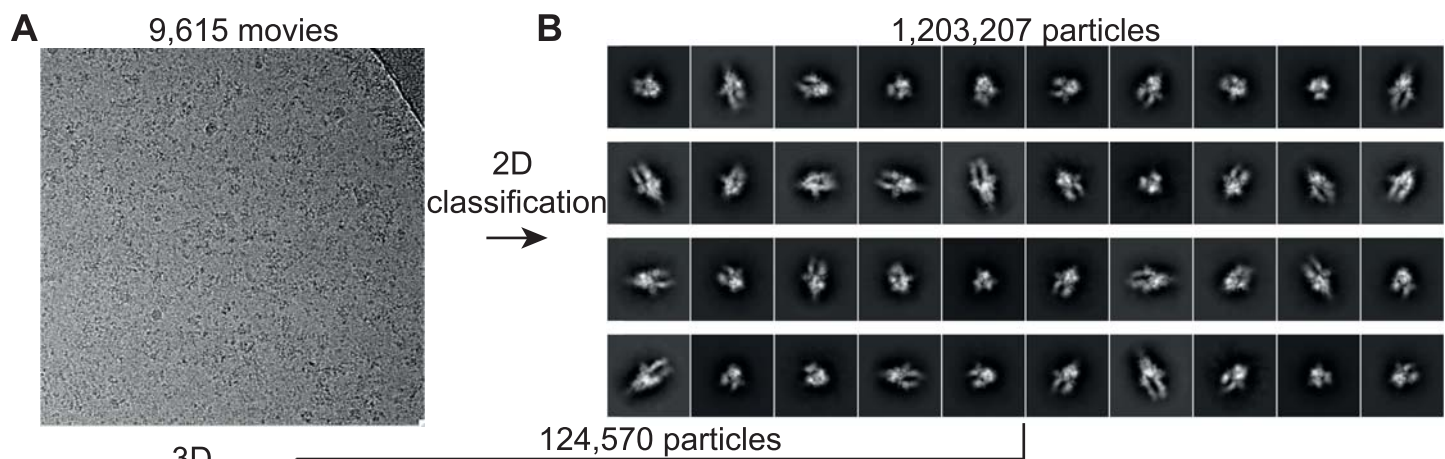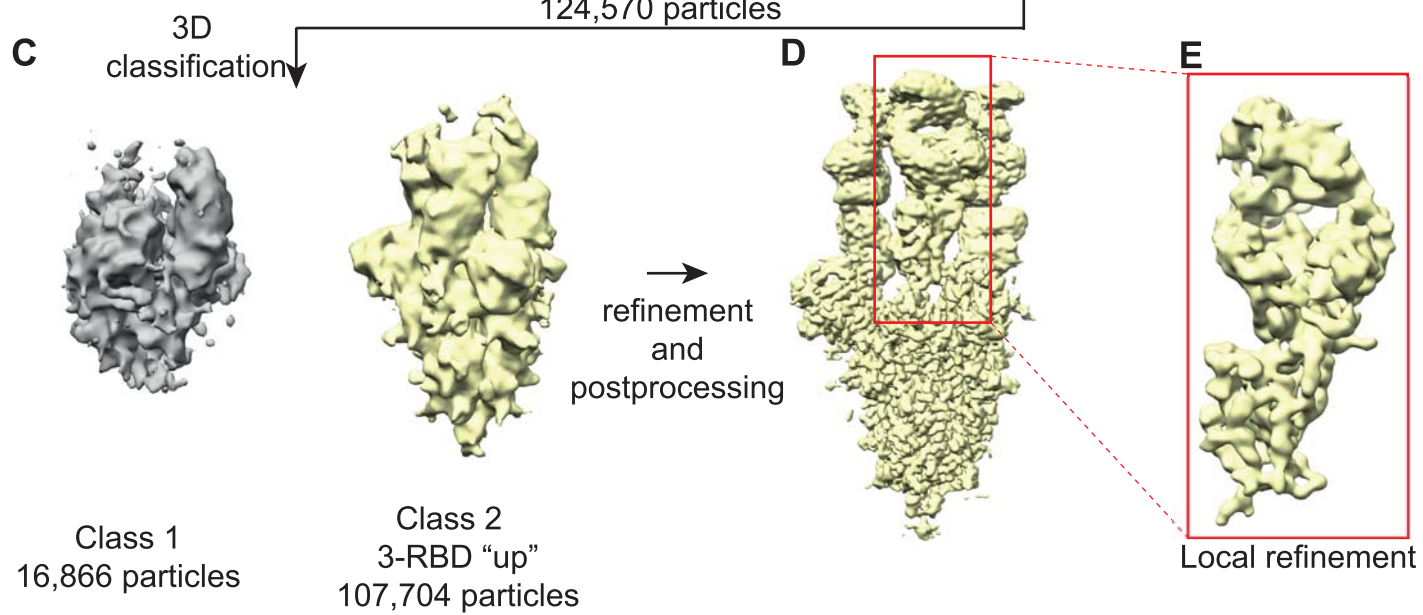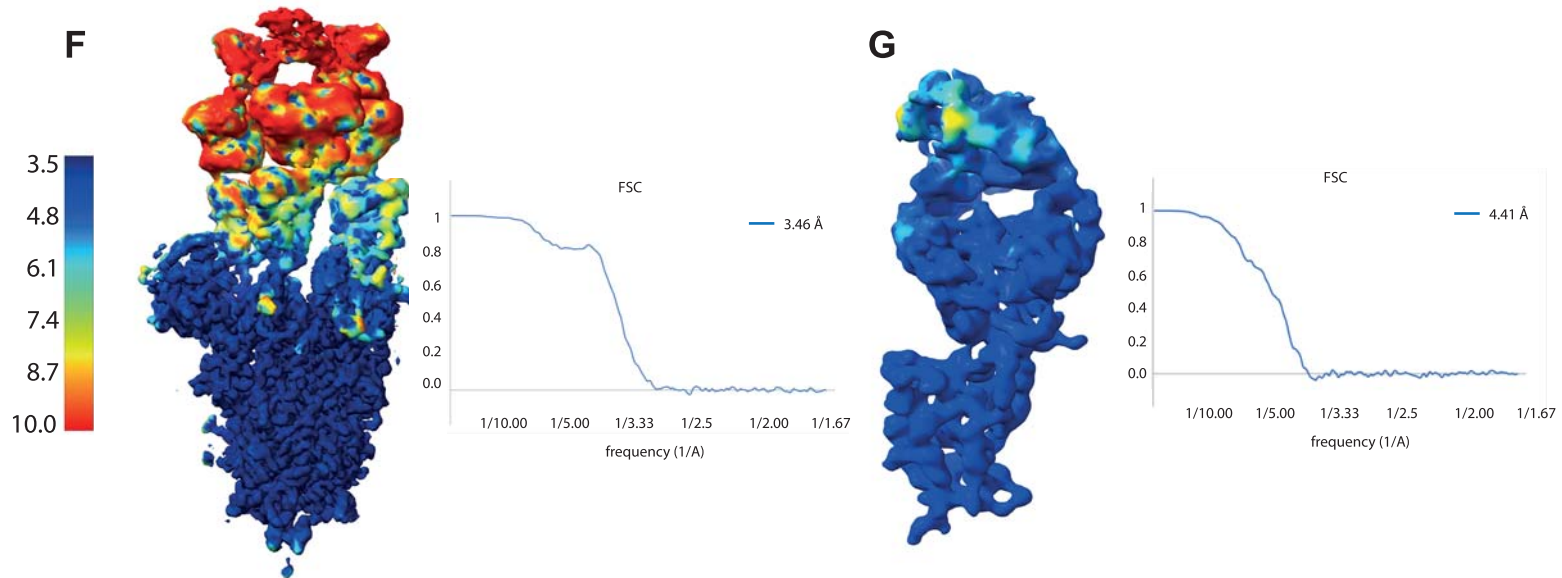

**Supplementary Figure 3. Cryo-EM data analysis for complex between the Omicron BA.1 spike trimer and the 17T2 Fab fragment.** (A) Representative electron micrograph. (B) Representative 2D-class averages. (C) 3D classification. Left class contains low quality particles and right class contains high quality particles that were selected for refinement. (D) 3D reconstruction of complex with no symmetric imposed. (E) The boxed region contains one RBD complexed with one Fab in a refined map masked by local refinement. (F-G) Gold standard Fourier shell correlation (FSC) curve of final overall (left) and locally refined (right) maps and resolution estimation based on 0.143 Fourier shell correlation criteria as indicated by a blue line.

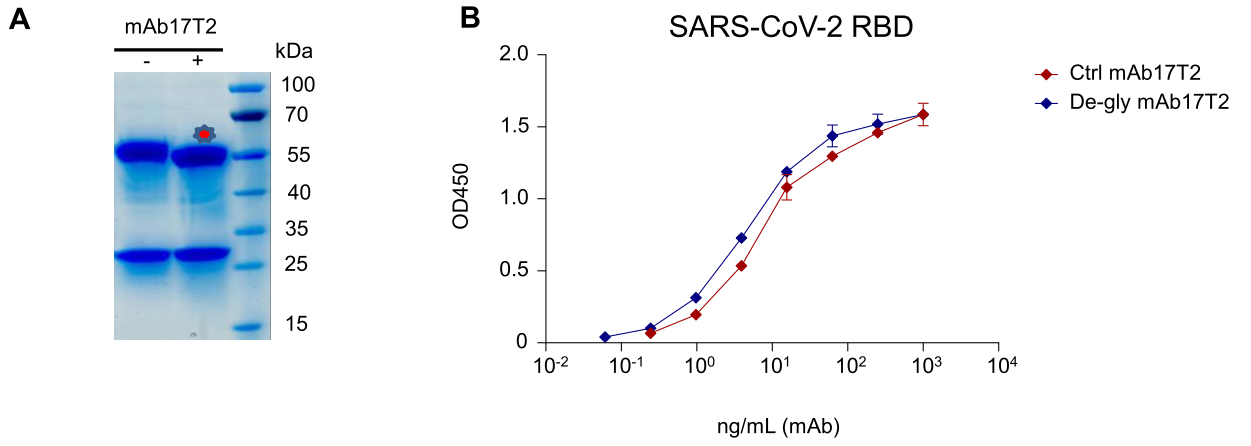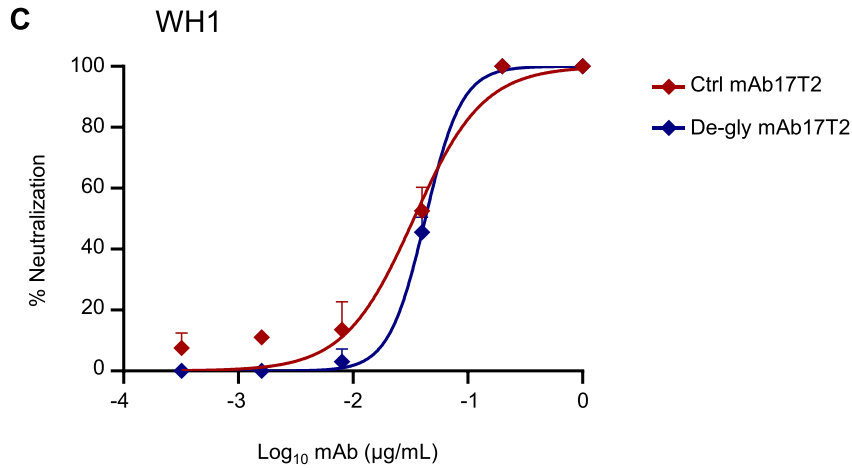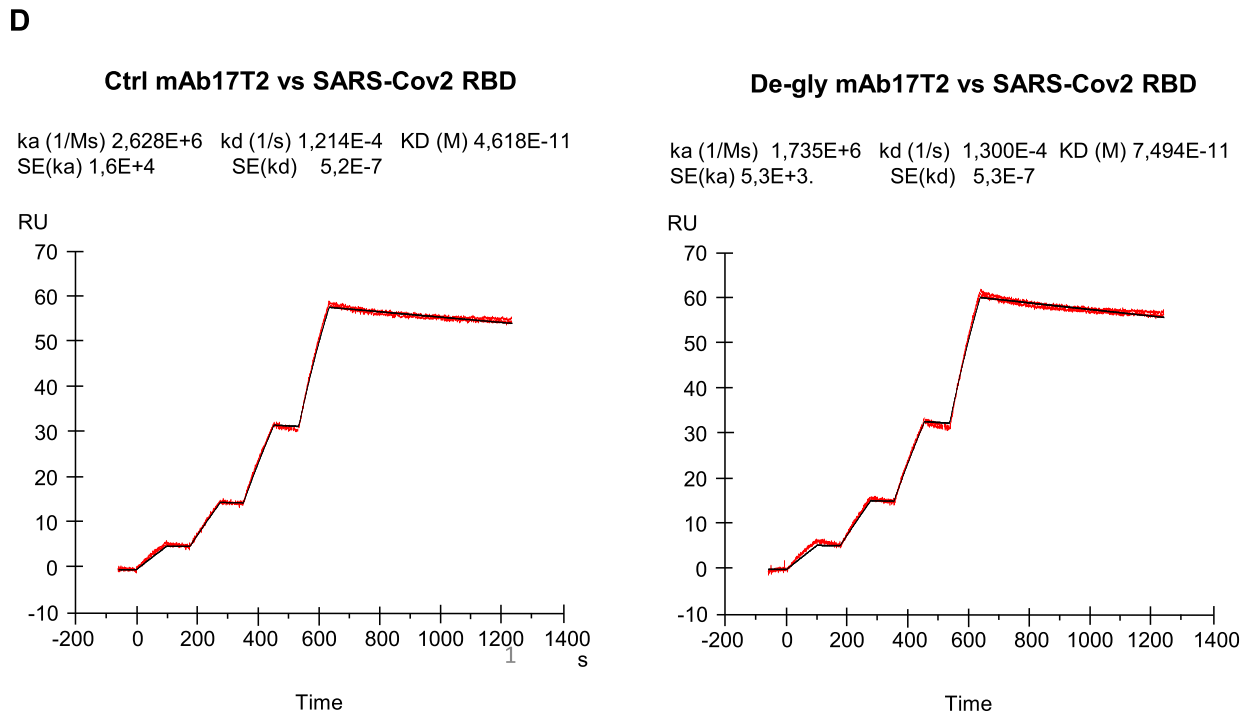



**Supplementary Figure 4. PNGase F treatment of purified 17T2 mAb.** (A) Purified 17T2 mAb was incubated in the presence (+) or absence (-) of recombinant PNGase F and analyzed by SDS-PAGE. Red asterisks indicate the de-glycosylated product. (B) ELISA binding curves of serial dilutions of control treated 17T2 (red) and de-glycosylated 17T2 (blue) mAbs to recombinant SARS-CoV-2 RBD, coated at equimolar concentrations. Graph bars represent the average  $\pm$  SD. (C) Neutralization curves of control treated 17T2 (red) and de-glycosylated 17T2 (blue) mAbs against ancestral SARS-CoV-2 WH1 variant. Values are mean  $\pm$  SD of duplicate samples. (D) The binding kinetics of de-glycosylated (left) and no de-glycosylated form of 17T2 mAb (right) to recombinant SARS-CoV-2 RBD were obtained using the BIAcore T100 system in single-cycle mode. mAbs were captured on the chip, and serial dilutions of RBD (WH1) were then injected over the chip surface. The  $K_D$  is labelled accordingly.

**A**

|             |       | CDRH1 17T2 |    |    |    |    |    |    |    |    |    |    |    | CDRH2 17T2 |    |    |    |    |    |    |     | CDRH3 17T2 |     |     |     |     |     |     |     |     |     |     |     |
|-------------|-------|------------|----|----|----|----|----|----|----|----|----|----|----|------------|----|----|----|----|----|----|-----|------------|-----|-----|-----|-----|-----|-----|-----|-----|-----|-----|-----|
|             |       | 26         | 27 | 28 | 29 | 30 | 31 | 32 | 33 | 51 | 52 | 53 | 54 | 55         | 56 | 57 | 58 | 97 | 98 | 99 | 100 | 101        | 102 | 103 | 104 | 105 | 106 | 107 | 108 | 109 | 110 | 111 | 112 |
| Heavy chain | 17T2  | V          | F  | T  | F  | S  | I  | S  | A  | I  | V  | V  | G  | S          | G  | N  | T  | A  | A  | P  | Y   | C          | N   | R   | T   | T   | C   | Y   | D   | G   | F   | D   | L   |
|             | S2E12 | G          | F  | T  | F  | T  | S  | S  | A  | I  | V  | V  | G  | S          | G  | N  | T  | A  | S  | P  | Y   | C          | S   | G   | G   | S   | C   | S   | D   | G   | F   | D   | I   |

  

|             |       | CDRL1 17T2 |    |    |    |    |    | CDRL2 17T2 |    |    | CDRL3 17T2 |    |    |    |    |    |    |    |    |    |    |
|-------------|-------|------------|----|----|----|----|----|------------|----|----|------------|----|----|----|----|----|----|----|----|----|----|
|             |       | 27         | 28 | 29 | 30 | 31 | 32 | 33         | 51 | 52 | 53         | 90 | 91 | 92 | 93 | 94 | 95 | 96 | 97 | 98 | 99 |
| Light chain | 17T2  | Q          | S  | I  | S  | S  | N  | Y          | G  | A  | S          | Q  | H  | Y  | G  | G  | L  | S  | R  | W  | T  |
|             | S2E12 | Q          | S  | V  | S  | S  | S  | Y          | G  | A  | S          | Q  | Q  | Y  | V  | G  | L  | T  | G  | W  | T  |

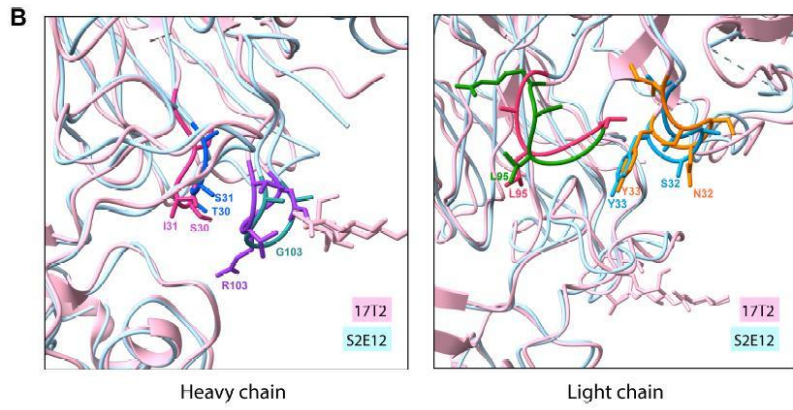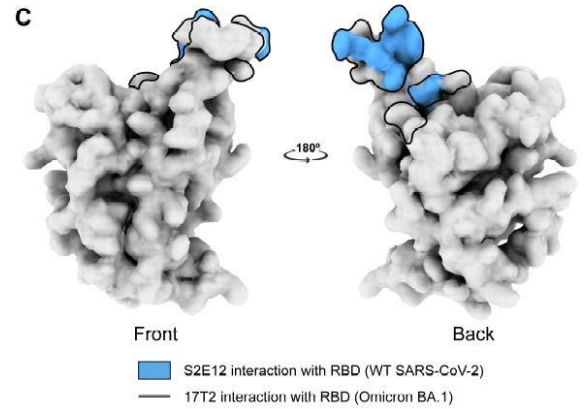

**Supplementary Figure 5. Comparative study of 17T2 Fab with similar antibody S2E12 Fab.**

**(A)** Comparison of the sequences of the CDRs of both the heavy and light chains between the 17T2 and S2E12 antibodies, showing differences between residues with colors. **(B)** Alignment of the RBD-Fab structures of 17T2 and S2E12 Fabs showing the side chains of the residues that are part of the regions with sequence differences (color codes as in **(A)**). **(C)** Different areas of interaction of 17T2 and S2E12 Fabs with the RBD of SARS-CoV-2 spike.

**Supplementary Table 1. Phenotype and native isotype of the B cells originating the mAbs, and the antibody gene usage of the heavy and light chain variable regions.**

| Name  | B cell of origin                                                                                                                                 |         |
|-------|--------------------------------------------------------------------------------------------------------------------------------------------------|---------|
|       | B cell phenotype                                                                                                                                 | Isotype |
| 17T2  | CD19 <sup>+</sup> HLA-DR <sup>+</sup> CD27 <sup>+</sup> IgA <sup>+</sup> CD21 <sup>+</sup> IgM <sup>+</sup> IgD <sup>-</sup> lambda <sup>-</sup> | IgA     |
| 54T1  | CD19 <sup>+</sup> HLA-DR <sup>+</sup> CD27 <sup>+</sup> IgA <sup>+</sup> CD21 <sup>+</sup> IgM <sup>+</sup> IgD <sup>-</sup> lambda <sup>-</sup> | IgA     |
| 130T1 | CD19 <sup>+</sup> HLA-DR <sup>+</sup> CD27 <sup>+</sup> IgA <sup>-</sup> CD21 <sup>+</sup> IgM <sup>+</sup> IgD <sup>-</sup> lambda <sup>-</sup> | IgG     |
| 119T2 | CD19 <sup>+</sup> HLA-DR <sup>+</sup> CD27 <sup>+</sup> IgA <sup>-</sup> CD21 <sup>+</sup> IgM <sup>+</sup> IgD <sup>-</sup> lambda <sup>+</sup> | IgG     |
| 131T2 | CD19 <sup>+</sup> HLA-DR <sup>+</sup> CD27 <sup>+</sup> IgA <sup>-</sup> CD21 <sup>+</sup> IgM <sup>+</sup> IgD <sup>-</sup> lambda <sup>-</sup> | IgG     |

| Name  | IgHeavy          |                                     |                   |              |
|-------|------------------|-------------------------------------|-------------------|--------------|
|       | V call           | D call                              | J call            | % V identity |
| 17T2  | IGHV1-58*01      | IGHD2-2*01,IGHD2-2*02,IGHD2-2*03    | IGHJ3*01,IGHJ3*02 | 94,5         |
| 54T1  | IGHV3-53*04      | IGHD5-12*01                         | IGHJ6*02          | 96,6         |
| 130T1 | IGHV1-46*01      | IGHD5-18*01,IGHD5-5*01              | IGHJ4*01,IGHJ4*02 | 96,6         |
| 119T2 | IGHV3-9*01       | IGHD2-15*01,IGHD2-21*01,IGHD2-21*02 | IGHJ3*02          | 98           |
| 131T2 | IGHV3-30*18,IGHV | IGHD5-18*01,IGHD5-5*01              | IGHJ4*02          | 97,3         |

| Name  | IgLight |             |          |              |
|-------|---------|-------------|----------|--------------|
|       | Chain   | V call      | J call   | % V identity |
| 17T2  | Kappa   | IGKV3-20*01 | IGKJ1*01 | 96,5         |
| 54T1  | Kappa   | IGKV1-9*01  | IGKJ1*01 | 98,6         |
| 130T1 | Kappa   | IGKV1-17*01 | IGKJ1*01 | 98,6         |
| 119T2 | Lambda  | IGLV2-14*03 | IGLJ3*02 | 98,3         |
| 131T2 | Kappa   | IGKV3-15*01 | IGKJ4*01 | 97,6         |

**Supplementary Table 2. Kinetic rate constants and affinities determined for the 17T2 mAb against SARS-CoV-2 RBD variants.**

| 17T2                    |           |                       |                                  |
|-------------------------|-----------|-----------------------|----------------------------------|
| SARS-CoV-2 RBD variants | ka (1/Ms) | kd (1/s) <sup>a</sup> | K <sub>D</sub> (nM) <sup>b</sup> |
| WH1                     | 2,62E+06  | 1,21E-4               | 0,0462                           |
| Alpha                   | 9,61E+05  | <1.0E-05              | <0.1                             |
| Beta                    | 2,30E+06  | <1.0E-05              | <0.1                             |
| Delta                   | 3,32E+06  | <1.0E-05              | <0.1                             |
| Omicron BA.1            | 1,08E+07  | <1.0E-05              | <0.1                             |
| Omicron BA.2            | 5,90E+07  | <1.0E-05              | <0.1                             |

a. For most of the Biacore experiments, no decay in the binding signal was observed during the time allowed for dissociation. According to the “5% rule”, the  $k_d$  can be resolved only if 5% or more of the bound material dissociates. Therefore, the upper limit on the  $K_d$  (in 1/s) is given by  $K_d < \ln(0.95)/t_d$ , where  $t_d$  is the amount of time (in seconds) allowed for dissociation.

b.  $K_D$  based on the  $k_d$  limit determined by the “5% rule.”

**Supplementary Table 3. Pseudovirus spike mutations relative to ancestral WH1.**

| Name   | Mutations                                                                                                                                                                                                                                                  |
|--------|------------------------------------------------------------------------------------------------------------------------------------------------------------------------------------------------------------------------------------------------------------|
| D614G  | D614G                                                                                                                                                                                                                                                      |
| Alpha  | H69-70del, Y144del, N501Y, A570D, P681H, T716I, S982A and D1118H                                                                                                                                                                                           |
| Beta   | L18F, D80S, D215G, L242-244del, R246I, K417N, E484K, N501Y, D614G, A701V                                                                                                                                                                                   |
| Gamma  | L18F, T20N, P26S, D138Y, R190S, K417T, E484K, N501Y, D614G, H655Y, T1027I, V1176F                                                                                                                                                                          |
| Delta  | T19R, 157-158 del, L452R, T478K, D614G, P681R, D950N                                                                                                                                                                                                       |
| Mu     | T95I, Y144S, Y145N, R346K, E484K, N501Y, D614G, P681H, D950N                                                                                                                                                                                               |
| BA.1   | A67V, H69-70del, T95I, G142D, V143-145del, N211del, L212I, ins214EPE, G339D, S371L, S373P, S375F, K417N, N440K, G446S, S477N, T478K, E484A, Q493R, G496S, Q498R, N501Y, Y505H, T547K, D614G, H655Y, N679K, P681H, N764K, D796Y, N856K, Q954H, N969K, L981F |
| BA.2   | T19I, L24S, P25-27del, G142D, V213G, G339D, S371F, S373P, S375F, T376A, D405N, R408S, K417N, N440K, S477N, T478K, E484A, Q493R, Q498R, N501Y, Y505H, D614G, H655Y, N679K, P681H, N764K, D796Y, Q954H, N969K                                                |
| BA.4/5 | T19I, L24S, P25-27del, H69-70del, G142D, V213G, G339D, S371F, S373P, S375F, T376A, D405N, R408S, K417N, N440K, L452R, S477N, T478K, E484A, F486V, Q498R, N501Y, Y505H, D614G, H655Y, N679K, P681H, N764K, D796Y, Q954H, N969K                              |
| BQ.1.1 | T19I, L24S, P25-27del, H69-70del, G142D, V213G, G339D, R346T, S371F, S373P, S375F, T376A, D405N, R408S, K417N, N440K, K444T, L452R, N460K, S477N, T478K, E484A, F486V, Q498R, N501Y, Y505H, D614G, H655Y, N679K, P681H, N764K, D796Y, Q954H, N969K         |

**Supplementary Table 4. Representation of reported SARS-CoV-2 RBD mutations in key variants.** Color highlighted boxes show the presence of RBD mutations in each SARS-CoV-2 variant (same color codes as in **Figure 3F**).

|               |           | Receptor-binding-domain mutations |     |     |     |     |     |     |     |     |     |     |     |     |     |     |     |     |     |     |     |     |     |     |     |
|---------------|-----------|-----------------------------------|-----|-----|-----|-----|-----|-----|-----|-----|-----|-----|-----|-----|-----|-----|-----|-----|-----|-----|-----|-----|-----|-----|-----|
|               |           | 339                               | 346 | 371 | 373 | 375 | 376 | 405 | 408 | 417 | 440 | 444 | 446 | 452 | 460 | 477 | 478 | 484 | 486 | 490 | 493 | 496 | 498 | 501 | 505 |
| WT Sars-Cov-2 |           | G                                 | R   | S   | S   | S   | T   | D   | R   | K   | N   | K   | G   | L   | N   | S   | T   | E   | F   | F   | Q   | G   | Q   | N   | Y   |
| Alpha         | B.1.1.7   |                                   |     |     |     |     |     |     |     |     |     |     |     |     |     |     |     |     |     |     |     |     |     |     | Y   |
| Beta          | B.1.351   |                                   |     |     |     |     |     |     |     | N   |     |     |     |     |     |     |     | K   |     |     |     |     |     |     | Y   |
| Gamma         | P.1       |                                   |     |     |     |     |     |     |     | T   |     |     |     |     |     |     |     | K   |     |     |     |     |     |     | Y   |
| Delta         | B.1.617.2 |                                   |     |     |     |     |     |     |     |     |     |     |     | R   |     |     | K   |     |     |     |     |     |     |     |     |
| Epsilon       | B.1.427/9 |                                   |     |     |     |     |     |     |     |     |     |     |     | R   |     |     |     |     |     |     |     |     |     |     |     |
| Zeta          | P.2       |                                   |     |     |     |     |     |     |     |     |     |     |     |     |     |     |     |     |     |     |     |     |     |     |     |
| Eta           | B.1.525   |                                   |     |     |     |     |     |     |     |     |     |     |     |     |     |     |     |     |     |     |     |     |     |     |     |
| Theta         | P.3       |                                   |     |     |     |     |     |     |     |     |     |     |     |     |     |     |     |     |     |     |     |     |     |     | Y   |
| Iota          | B.1.526   |                                   |     |     |     |     |     |     |     |     |     |     |     |     |     |     |     |     |     |     |     |     |     |     |     |
| Kappa         | B.1.617.1 |                                   |     |     |     |     |     |     |     |     |     |     |     | R   |     |     | K   | Q   |     |     |     |     |     |     |     |
| Lambda        | C.37      |                                   |     |     |     |     |     |     |     |     |     |     |     | Q   |     |     |     |     |     |     |     |     |     |     |     |
| Mu            | B.1.621   |                                   | K   |     |     |     |     |     |     |     |     |     |     |     |     |     |     |     |     |     | S   |     |     |     | Y   |
| Omicron       | BA.1      | D                                 |     | L   | P   | F   |     |     |     | N   | K   |     | S   |     | N   | K   | A   |     |     |     | R   | S   | R   | Y   | H   |
|               | BA.2      | D                                 |     | F   | P   | F   | A   | N   | S   | N   | K   |     |     |     | N   | K   | A   |     |     |     | R   |     | R   | Y   | H   |
|               | BA.4/BA.5 | D                                 |     | F   | P   | F   | A   | N   | S   | N   | K   |     | R   |     | N   | K   | A   | V   |     |     |     |     | R   | Y   | H   |
|               | BQ.1.1    | D                                 |     | F   | P   | F   | A   | N   | S   | N   | K   | T   |     | R   | K   | N   | K   | A   | V   |     |     |     |     | R   | Y   |

Supplementary Table 5. RBD/17T2 Fab model refinement and statistic.

| Model                           | RBD-Fab                    |             |
|---------------------------------|----------------------------|-------------|
| <b>Composition (#)</b>          |                            |             |
| Chains                          | 3                          |             |
| Atoms                           | 5106 (Hydrogens: 0)        |             |
| Residues                        | Protein: 652 Nucleotide: 0 |             |
| Water                           | 0                          |             |
| Ligands                         | NAG: 4                     |             |
| <b>Bonds (RMSD)</b>             |                            |             |
| Length (Å) (# > 4 $\sigma$ )    | 0.006 (0)                  |             |
| Angles (°) (# > 4 $\sigma$ )    | 1.208 (10)                 |             |
| MolProbity score                | 2.47                       |             |
| Clash score                     | 25.75                      |             |
| <b>Ramachandran plot (%)</b>    |                            |             |
| Outliers                        | 0.31                       |             |
| Allowed                         | 10.37                      |             |
| Favored                         | 89.32                      |             |
| Rotamer outliers (%)            | 0.71                       |             |
| C $\beta$ outliers (%)          | 0.00                       |             |
| <b>Peptide plane (%)</b>        |                            |             |
| Cis proline/general             | 5.4/0.2                    |             |
| Twisted proline/general         | 0.0/0.0                    |             |
| CaBLAM outliers (%)             | 5.00                       |             |
| <b>ADP (B-factors)</b>          |                            |             |
| Iso/Aniso (#)                   | 5106/0                     |             |
| min/max/mean                    |                            |             |
| Protein                         | 23.54/440.00/243.00        |             |
| Nucleotide                      | ---                        |             |
| Ligand                          | 106.97/440.00/301.85       |             |
| Water                           | ---                        |             |
| <b>Occupancy</b>                |                            |             |
| Mean                            | 1.00                       |             |
| occ = 1 (%)                     | 100.00                     |             |
| 0 < occ < 1 (%)                 | 0.00                       |             |
| occ > 1 (%)                     | 0.00                       |             |
| <b>Data</b>                     |                            |             |
| <b>Box</b>                      |                            |             |
| Lengths (Å)                     | 60.40, 66.15, 119.70       |             |
| Angles (°)                      | 90.00, 90.00, 90.00        |             |
| Supplied Resolution (Å)         | 3.5                        |             |
| <b>Resolution Estimates (Å)</b> | Masked                     | Unmasked    |
| d FSC (half maps; 0.143)        | 3.6                        | 3.8         |
| d 99 (full/half1/half2)         | 2.4/5.5/5.5                | 2.4/5.1/5.1 |
| d model                         | 2.0                        | 2.0         |
| d FSC model (0/0.143/0.5)       | 1.9/2.6/3.5                | 1.9/2.6/3.5 |
| Map min/max/mean                | -1.27/1.54/0.01            |             |
| <b>Model vs. Data</b>           |                            |             |
| CC (mask)                       | 0.78                       |             |
| CC (box)                        | 0.79                       |             |
| CC (peaks)                      | 0.79                       |             |
| CC (volume)                     | 0.78                       |             |
| Mean CC for ligands             | 0.84                       |             |
